# Supplementary material for: Time-course analysis of Drosophila suzukii interaction with endoparasitoid wasps evidences a delayed encapsulation response compared to D. melanogaster
Source: PubMed Central journal article supplement (PMC6072091; doi:10.1371/journal.pone.0201573), 2018-08-02

### Infection outcome: *D. sukuzii* L1

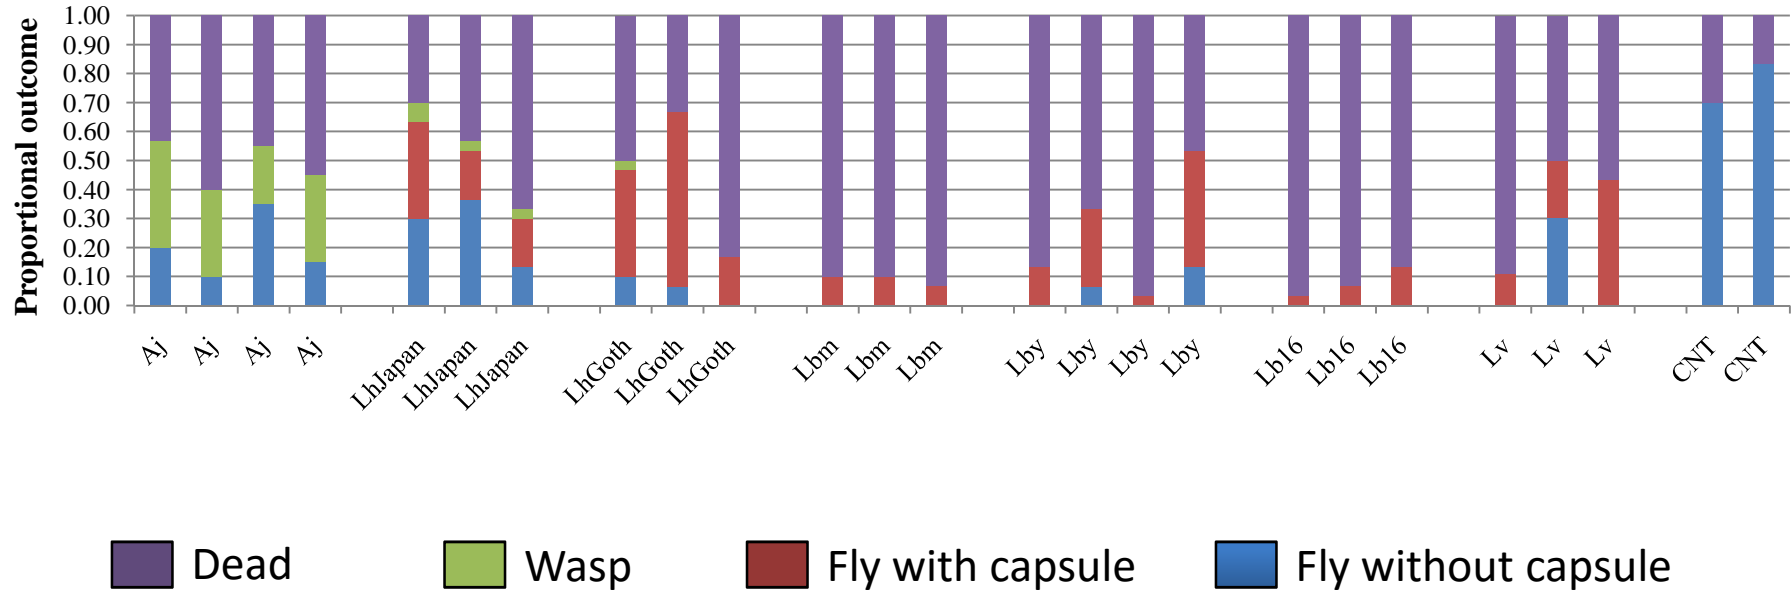

### Infection outcome: *D. sukuzii* L2

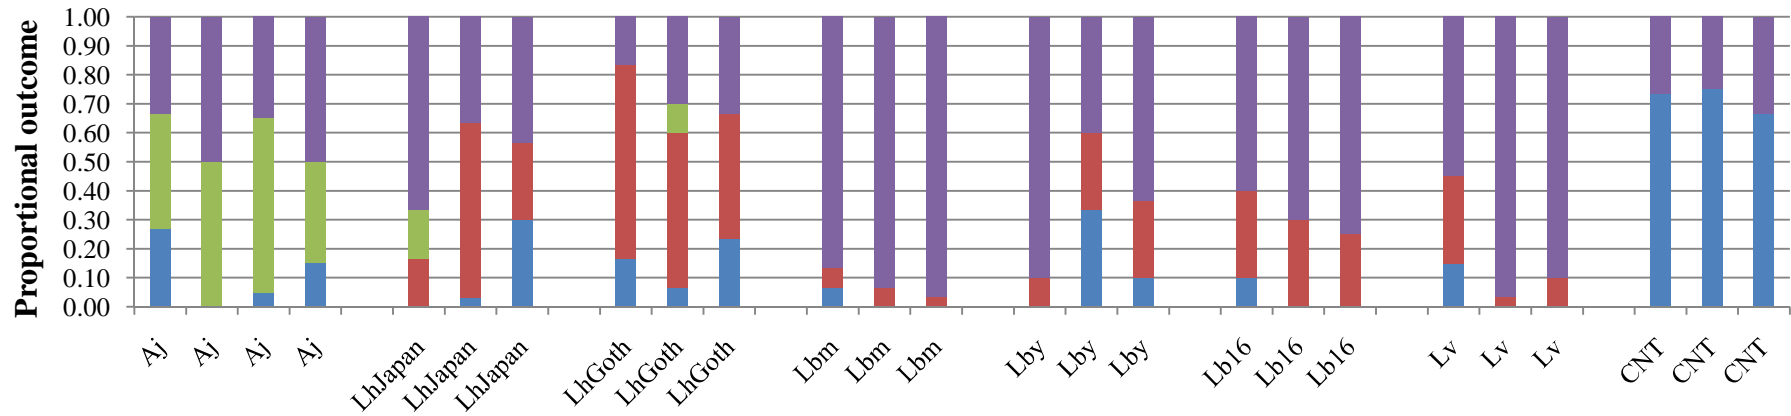

Supplement: pone.0201573.s001.pdf [file pone.0201573.s001.pdf]
