# Supplementary material for: Time-course analysis of Drosophila suzukii interaction with endoparasitoid wasps evidences a delayed encapsulation response compared to D. melanogaster
Source: PubMed Central journal article supplement (PMC6072091; doi:10.1371/journal.pone.0201573), 2018-08-02
Supplement: pone.0201573.s002.pdf [file pone.0201573.s002.pdf]

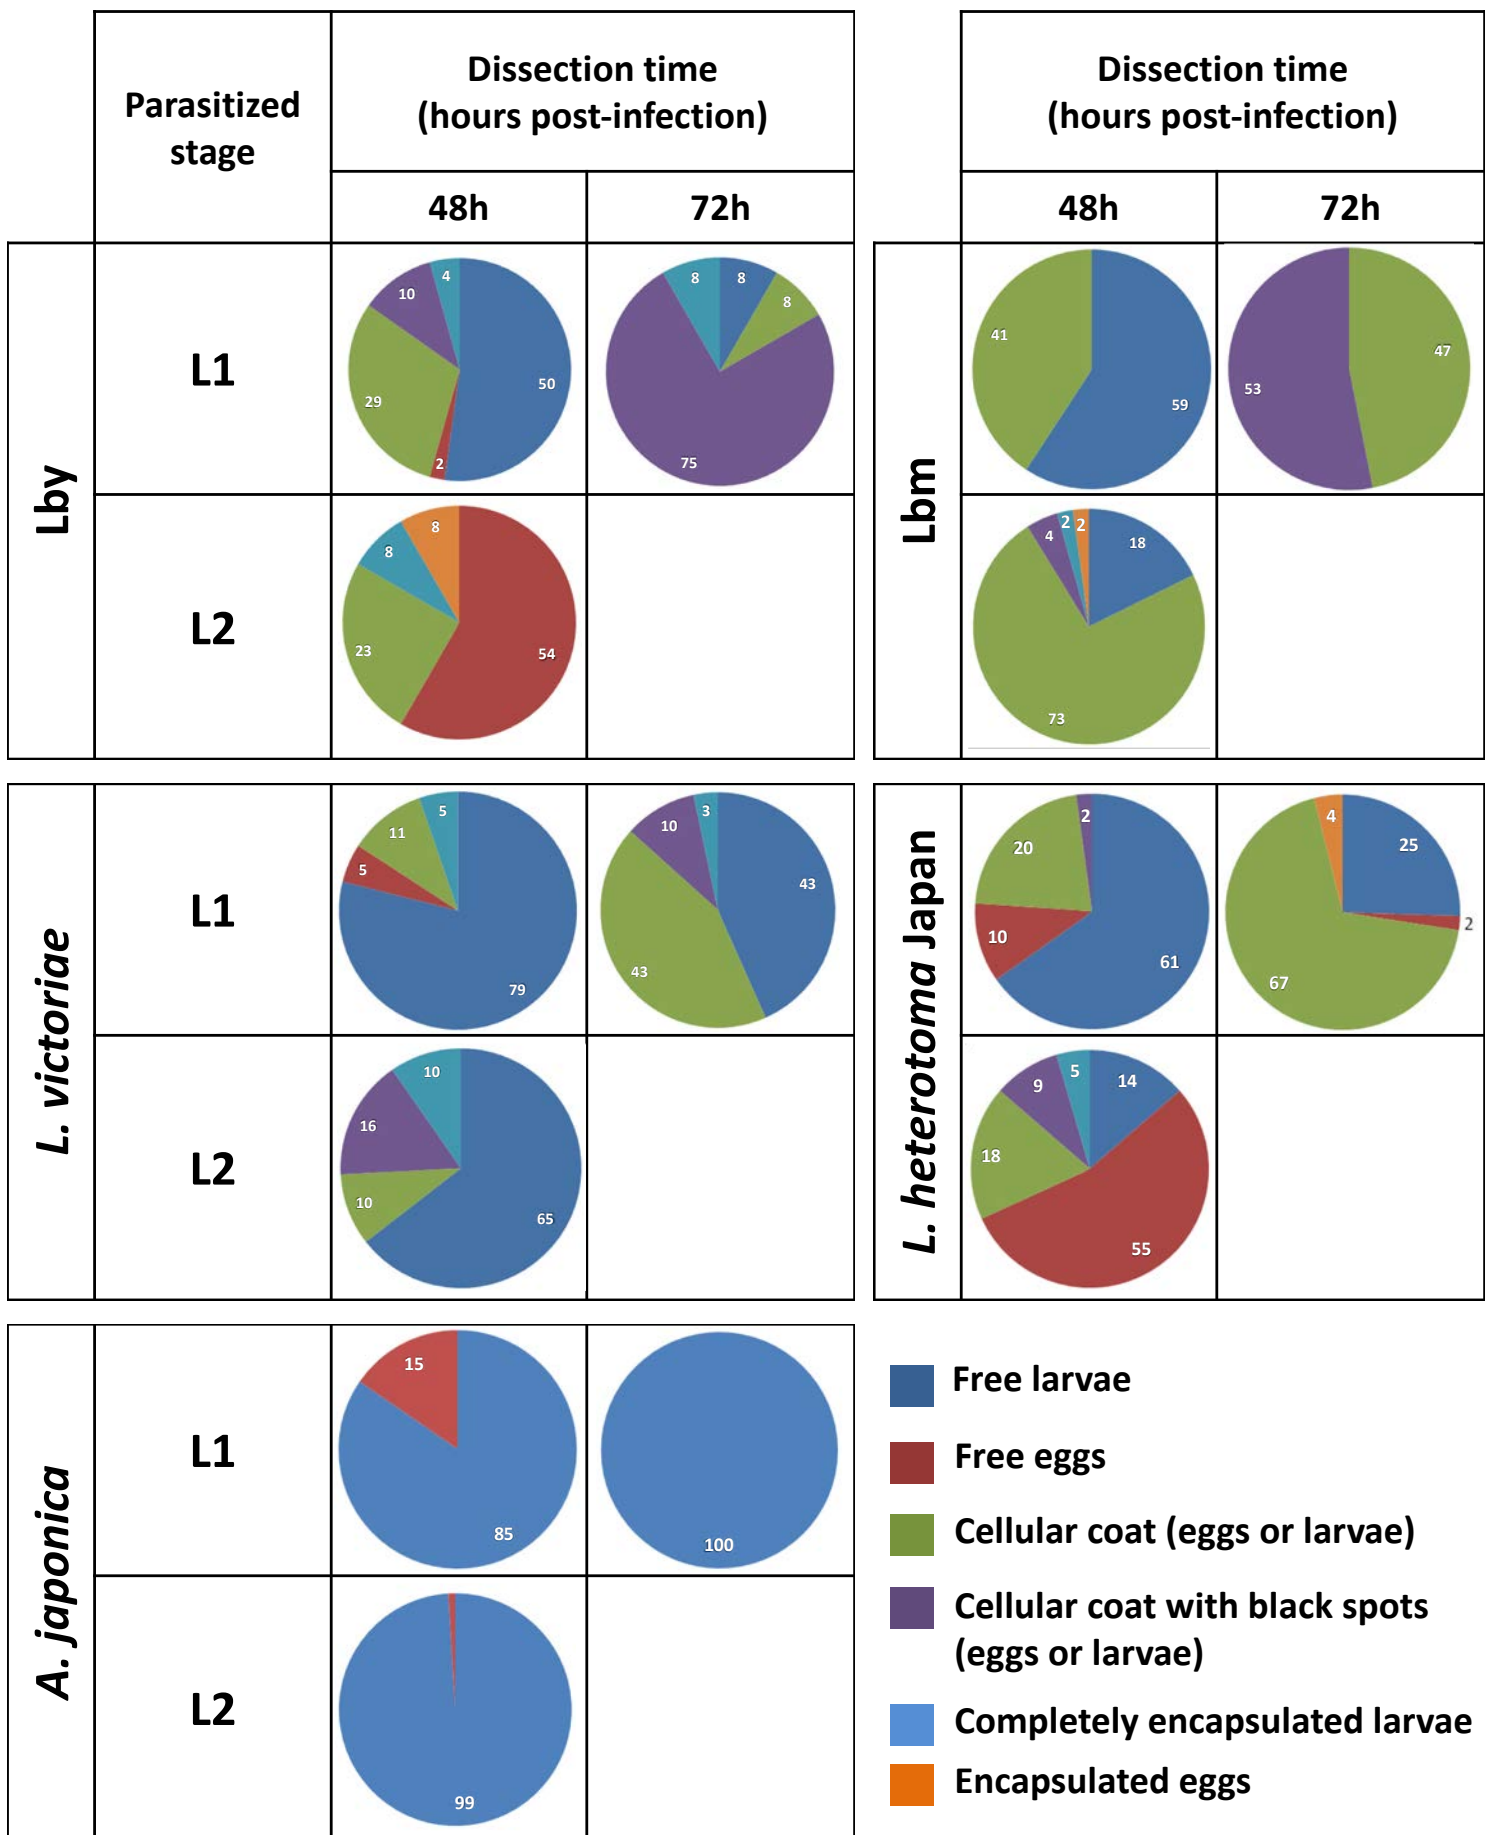

Supplementary Figure : Outcome of the parasitoid in parasitized *D. sukuzii* L1 (48/72h post-infection) and L2 larvae (48h post-infection). Numbers in percent.
